# Supplementary material
Source: Springer Nature journal article supplement (https://www.springermedizin.de/resource/supplementary/12936_2008_698_MOESM5_ESM.pdf/9548026)
Supplement: MOESM5 [file 9548026]

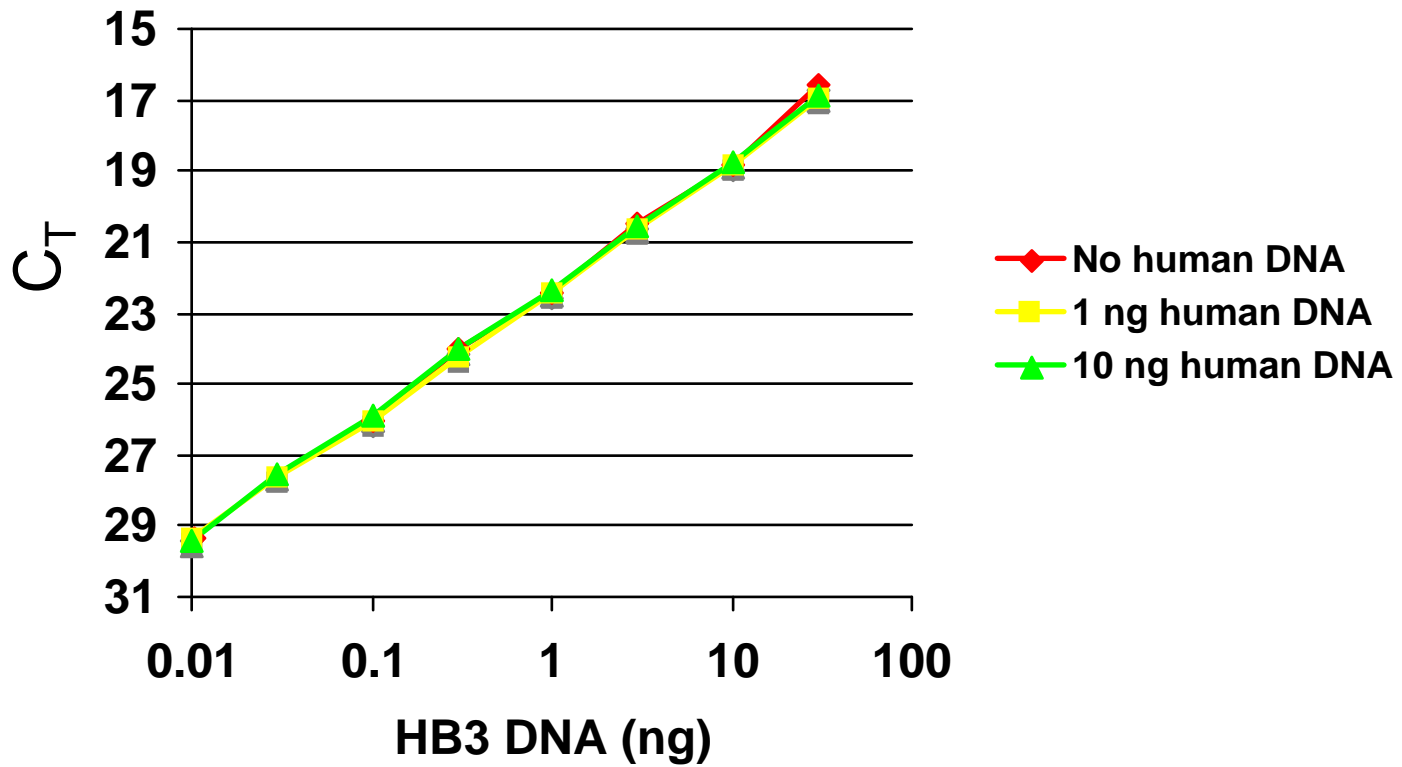

Daniels\_Additional File 5
